# Supplementary material for: Intentional construction of high-performance SnO2 catalysts with a 3D porous structure for electrochemical reduction of CO2
Source: Royal Society of Chemistry journal article supplement (doi:10.1039/c9nr06354d), 2019-01-01
Supplement: c9nr06354d1.pdf [file c9nr06354d1.pdf]

## Supplementary Information

### Intentional Construction of High-Performance $\text{SnO}_2$ Catalysts with 3D Porous Structure for Electrochemical Reduction of $\text{CO}_2$

Xinxin Zhang,<sup>a, b</sup> Zhipeng Chen,<sup>a, b</sup> Kaiwen Mou,<sup>a, b</sup> Mingyang Jiao,<sup>a</sup> Xiangping Zhang,<sup>c, d</sup> and Licheng Liu<sup>\*a, d</sup>

- 
- a CAS Key Laboratory of Bio-based Materials  
Qingdao Institute of Bioenergy and Bioprocess Technology  
Chinese Academy of Sciences, Qingdao 266101, Shandong, China.  
E-mail: liulc@qibebt.ac.cn
- b University of Chinese Academy of Sciences  
Beijing 100049, China.
- c Institute of Process Engineering, Chinese Academy of Sciences,  
Beijing 100190, China.
- d Dalian National Laboratory for Clean Energy  
Dalian 116023, China.

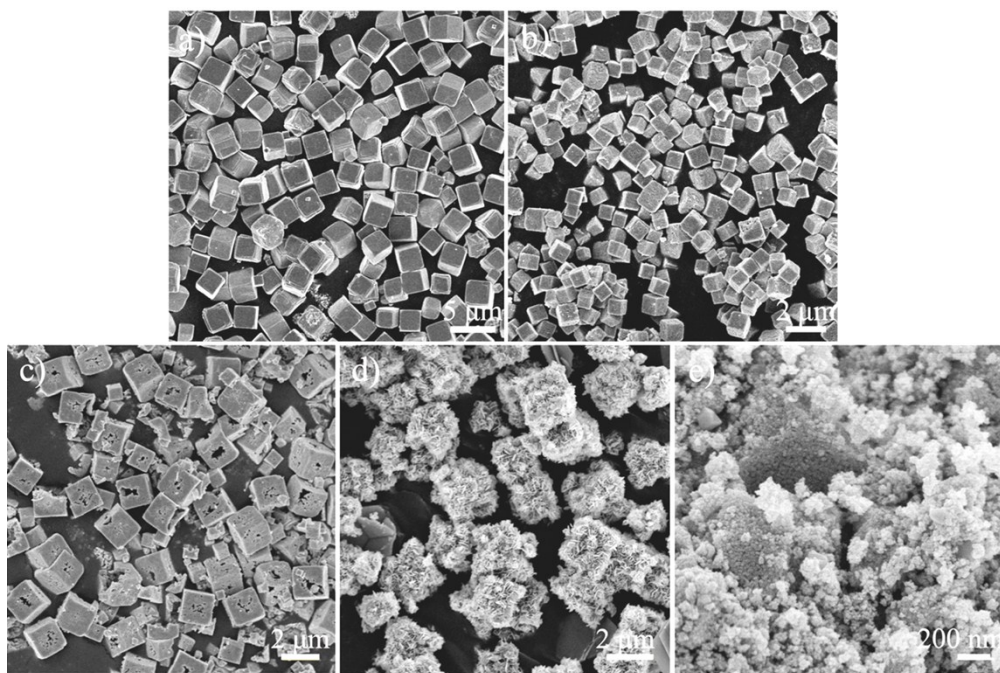

**Figure S1.** SEM images of  $\text{ZnSn}(\text{OH})_6$  (a),  $\text{Zn}_2\text{SnO}_4/\text{SnO}_2$  (b),  $\text{SnO}_2\text{-NCs}$  (c),  $\text{SnO}_2\text{-NFs}$  (d) and  $\text{SnO}_2\text{-NPs}$  (e).

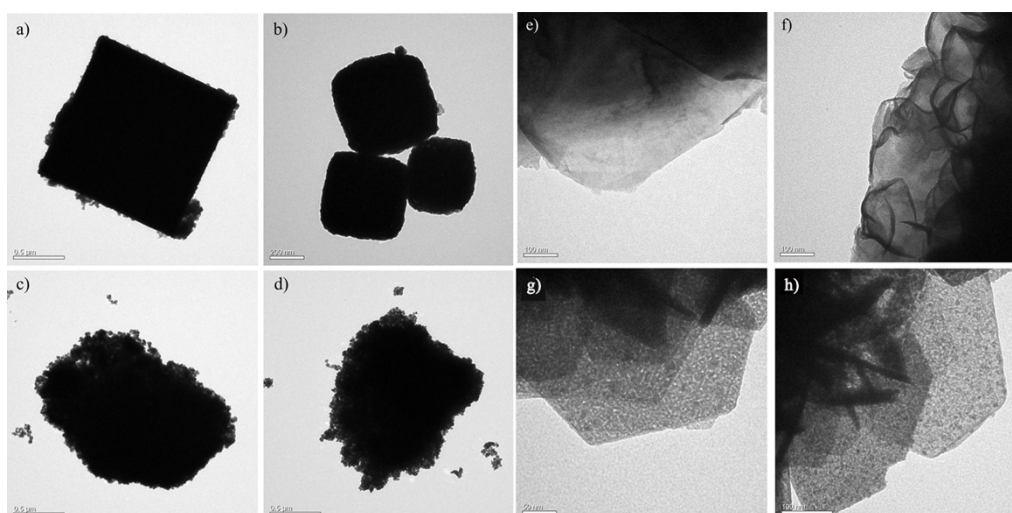

**Figure S2.** TEM images of  $\text{ZnSn(OH)}_6$  (a),  $\text{Zn}_2\text{SnO}_4/\text{SnO}_2$  (b),  $\text{SnO}_2\text{-NCs}$  (c, d),  $\text{SnS}_2$  (e, f),  $\text{SnO}_2\text{-NFs}$  (g, h).

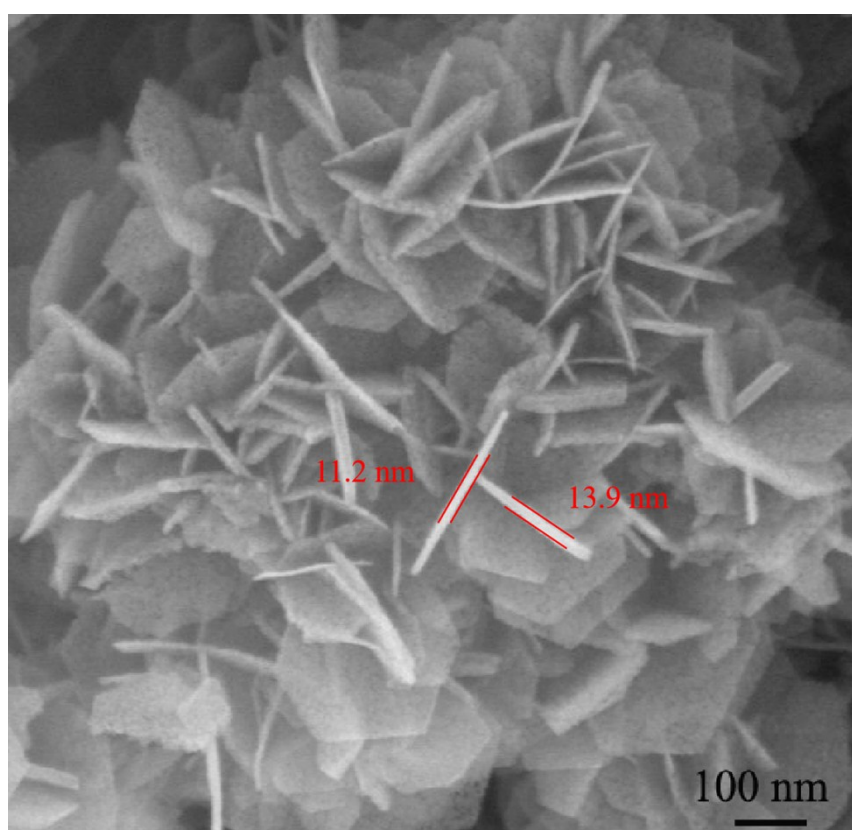

**Figure S3.** SEM image of  $\text{SnO}_2\text{-NFs}$ .

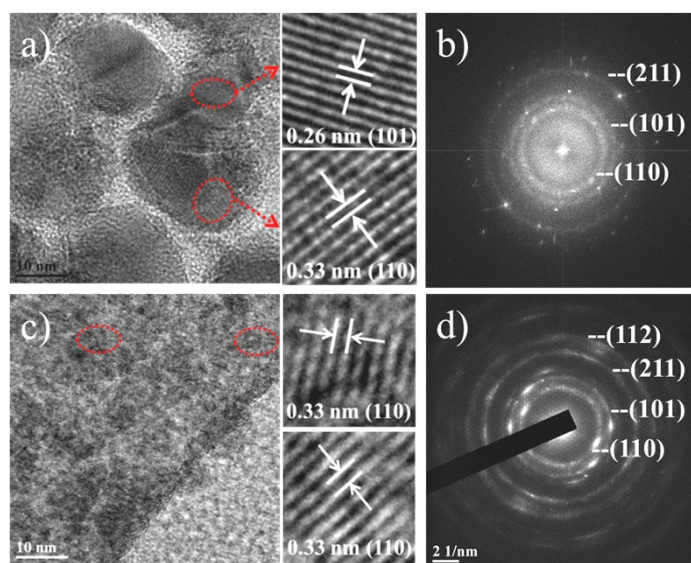

**Figure S4.** HRTEM images and the corresponding SAED patterns of  $\text{SnO}_2\text{-NCs}$  (a, b) and  $\text{SnO}_2\text{-NFs}$  (c, d).

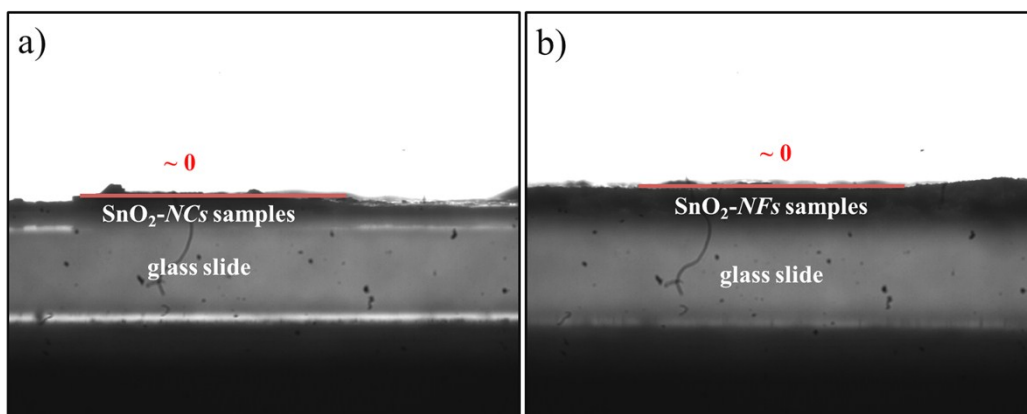

**Figure S5.** Contact angle of  $\text{SnO}_2\text{-NCs}$  and  $\text{SnO}_2\text{-NFs}$  samples.

The contact angles of  $\text{SnO}_2\text{-NCs}$  and  $\text{SnO}_2\text{-NFs}$  samples with 0.5M  $\text{KHCO}_3$  electrolyte (3 $\mu\text{L}$ ) were illustrated in Figure S5, indicating that the samples have the excellent wettability. Before the test, ~100mg of the  $\text{SnO}_2$  sample powder was extruded by tablet press machine to ensure that the test surface was smooth and flat.

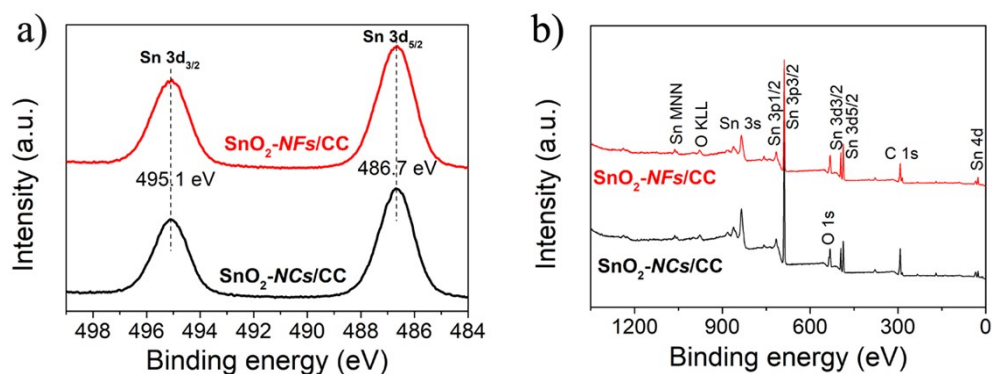

**Figure S6.** The Sn 3d (a) and survey (b) XPS spectra of SnO<sub>2</sub>-NCs and SnO<sub>2</sub>-NFs after long-term electrolysis experiments.

Figure S6 gives the typical Sn 3d XPS spectra of SnO<sub>2</sub>-NCs and SnO<sub>2</sub>-NFs after long-term electrolysis experiments. All samples reveal two major fitting peaks with binding energies at 495.1 eV and 486.7 eV, which could be assigned to Sn 3d<sub>3/2</sub> and 3d<sub>5/2</sub>, respectively, and clearly confirms the Sn(IV) oxidation state of SnO<sub>2</sub>.<sup>1-5</sup>

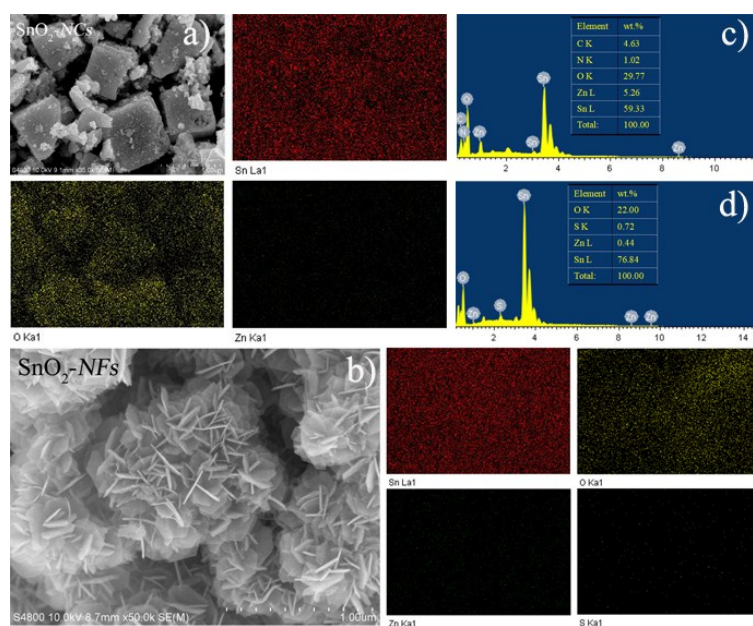

**Figure S7.** SEM-EDX elemental mapping images of SnO<sub>2</sub>-NCs (a) and SnO<sub>2</sub>-NFs (b); and the corresponding weight contents of the elements in SnO<sub>2</sub>-NCs (c) and SnO<sub>2</sub>-NFs (d).

SEM-EDX elemental mapping images of SnO<sub>2</sub>-NCs and SnO<sub>2</sub>-NFs are shown in



Figure S7. The actual distribution of Sn, Zn, O, and S elements clearly identifies. To obtain more convincing results, ICP experiment has been carried out with emphasize on Zn concentration. According to ICP results, Zn concentration is 0.22 wt. % for SnO<sub>2</sub>-NCs and 0.46 wt. % for SnO<sub>2</sub>-NFs, respectively.

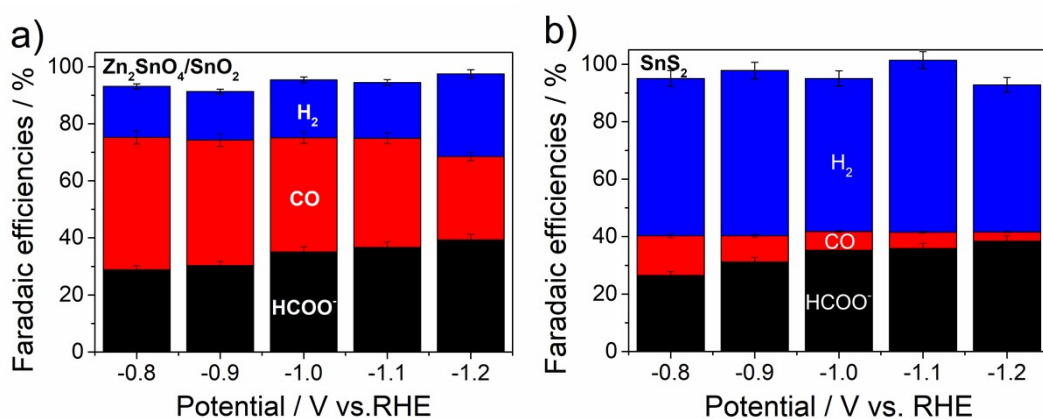

**Figure S8.** Faradaic efficiencies of Zn<sub>2</sub>SnO<sub>4</sub>/SnO<sub>2</sub> (a) and SnS<sub>2</sub> (b) catalysts at different electrolytic potentials.

Figure S8b is Faradaic efficiencies of HCOO<sup>-</sup>, CO and H<sub>2</sub> at different electrolytic potentials on SnS<sub>2</sub> (the precursor of SnO<sub>2</sub>-NFs, before desulfurization) sample, which shows poor performance on CO<sub>2</sub>RR compared to SnO<sub>2</sub>-NFs samples. Therefore, the activity of the electrocatalysts is most likely from SnO<sub>2</sub>.

**Table S1.** Comparison of electrocatalytic activity for electrochemical reduction of CO<sub>2</sub> to formate on Sn-based electrodes in an aqueous electrolyte.

| Catalysts                     | Overpotential<br>(V vs.<br>RHE) | FE<br>(%)                                             | Current<br>density<br>(mA cm <sup>-2</sup> ) | Ref.                                              |
|-------------------------------|---------------------------------|-------------------------------------------------------|----------------------------------------------|---------------------------------------------------|
| Sn/SnO <sub>x</sub> Thin Film | -0.7                            | ~97.0 C1 <sup>[a]</sup><br>~41.0<br>HCOO <sup>-</sup> | -                                            | 2012<br><i>J. Am. Chem.<br/>Soc.</i> <sup>6</sup> |

|                                                   |                          |                                           |                                                                                             |                                                         |
|---------------------------------------------------|--------------------------|-------------------------------------------|---------------------------------------------------------------------------------------------|---------------------------------------------------------|
| nano-SnO <sub>2</sub> /graphene                   | -1.8<br>V vs. SCE        | >93.0                                     | 10.2 ( <i>j</i> <sub>total</sub> )                                                          | 2014<br><i>J. Am. Chem. Soc.</i> <sup>7</sup>           |
| Sn-pNWs<br>With grain<br>boundaries               | -0.8                     | ~80.0                                     | 4.8 ( <i>j</i> <sub>HCOO<sup>-</sup></sub> )                                                | 2017<br><i>Angew. Chem.</i> <sup>1</sup>                |
| Mesoporous SnO <sub>2</sub> -<br>NSs/CC           | ~-0.97                   | 87±2<br>HCOO <sup>-</sup>                 | 50 ( <i>j</i> <sub>total</sub> )<br>45 ( <i>j</i> <sub>HCOO<sup>-</sup></sub> )             | 2017<br><i>Angew. Chem.</i> <sup>8</sup>                |
| SnS <sub>2</sub> derived Sn on<br>rGO             | -0.68                    | 84.5                                      | 11.8<br>( <i>j</i> <sub>HCOO<sup>-</sup></sub> )                                            | 2017<br><i>Nano Energy</i> <sup>9</sup>                 |
| Sn/CNT-Agls                                       | -0.96                    | 82.7                                      | 32.9 ( <i>j</i> <sub>total</sub> )<br>26.7<br>( <i>j</i> <sub>HCOO<sup>-</sup></sub> )      | 2017<br><i>J. Mater. Chem. A</i> <sup>10</sup>          |
| SnO <sub>x</sub> @MWCNT-<br>COOH                  | -1.25<br>V vs. SHE       | ~100 C1<br>77.0<br>(HCOO <sup>-</sup> )   | 9.6 ( <i>j</i> <sub>total</sub> )                                                           | 2019<br><i>ChemSusChem</i> <sup>11</sup>                |
| Sn-OH-5.9 branches                                | -1.6<br>V vs.<br>Ag/AgCl | 93.1 C1<br>82 (HCOO <sup>-</sup> )        | ~17 ( <i>j</i> <sub>total</sub> )<br>10.7<br>( <i>j</i> <sub>HCOO<sup>-</sup></sub> )       | 2019<br><i>J. Am. Chem. Soc.</i> <sup>12</sup>          |
| ultra-small SnO <sub>2</sub> -<br>NPs<br>(< 5 nm) | -1.21                    | 80.0 C1<br>64.0(HCOO <sup>-</sup> )       | 145 ( <i>j</i> <sub>total</sub> )                                                           | 2018<br><i>J. Mater. Chem. A</i> <sup>13</sup>          |
| Sn-CNT40/ESGDEs                                   | -1.7<br>V vs.<br>Ag/AgCl | 69.84 ± 2.41                              | 34.21 ±<br>1.14                                                                             | 2018<br><i>J. CO<sub>2</sub> Util.</i> <sup>14</sup>    |
| PdSn/C                                            | -0.43                    | 99                                        | -                                                                                           | 2017<br><i>Angew. Chem.</i> <sup>15</sup>               |
| 1D SnO <sub>2</sub> WIT                           | -0.89 ~ -<br>1.29        | 93.0 C1<br>70.0<br>(HCOO <sup>-</sup> )   | -                                                                                           | 2018<br><i>Adv. Funct. Mater.</i> <sup>16</sup>         |
| SnO/C (2.6 nm)                                    | -0.86                    | ~97.0 C1<br>~70.0<br>(HCOO <sup>-</sup> ) | ~28.5<br>( <i>j</i> <sub>total</sub> )<br>~20.0<br>( <i>j</i> <sub>HCOO<sup>-</sup></sub> ) | 2018<br><i>Angew. Chem.</i> <sup>4</sup>                |
| mesoporous SnO <sub>2</sub>                       | -1.15                    | 75.0                                      | 10.8 ( <i>j</i> <sub>total</sub> )<br>8.2( <i>j</i> <sub>HCOO<sup>-</sup></sub> )           | 2018<br><i>ACS Sustainable Chem. Eng.</i> <sup>17</sup> |
| TNS-2.0-SnO <sub>2</sub>                          | -1.6                     | 73.0                                      | 11                                                                                          | 2018<br><i>Adv. Energy Mater.</i> <sup>18</sup>         |

|                                             |                   |                                         |                                                                                       |                                                       |
|---------------------------------------------|-------------------|-----------------------------------------|---------------------------------------------------------------------------------------|-------------------------------------------------------|
| mesoporous-SnO <sub>2</sub>                 | -0.9              | 83.0                                    | 16( <i>j</i> <sub>HCOO<sup>-</sup></sub> )                                            | 2019<br><i>J. Mater. Chem. A</i> <sup>19</sup>        |
| urchin-like SnO <sub>2</sub>                | -1.0<br>V vs. SHE | 62.0                                    | -                                                                                     | 2017<br><i>Electrochim. Acta</i> <sup>20</sup>        |
| heat-treated Sn dendrite                    | -1.36             | 71.6                                    | -                                                                                     | 2015<br><i>ChemSusChem</i> <sup>21</sup>              |
| Sn quantum sheets confined in graphene      | -1.8<br>V vs. SCE | 89.0                                    | 21.1 ( <i>j</i> <sub>total</sub> )                                                    | 2016<br><i>Nat. Commun.</i> <sup>22</sup>             |
| CuOy/SnOx-CNT-#12                           | -1.09             | 79.0                                    | 6.2 ( <i>j</i> <sub>HCOO<sup>-</sup></sub> )                                          | 2017 <i>ACS Appl. Mater. Interfaces</i> <sup>23</sup> |
| Sub-5nm SnO <sub>2</sub> /C                 | -0.9              | 76 C1<br>54 (HCOO <sup>-</sup> )        | 5.1 ( <i>j</i> <sub>total</sub> )<br>3.7 ( <i>j</i> <sub>HCOO<sup>-</sup></sub> )     | 2018<br><i>J. Mater. Chem. A</i> <sup>24</sup>        |
| 5 atm% Ni-doped SnS <sub>2</sub> nanosheets | -0.9              | 93 C1<br>80 (HCOO <sup>-</sup> )        | 19.6                                                                                  | 2018<br><i>Angew. Chem.</i> <sup>25</sup>             |
| bimetallic Bi-Sn catalyst                   | -1.14             | 96 (HCOO <sup>-</sup> )                 | -                                                                                     | 2018<br><i>Adv. Energy Mater.</i> <sup>26</sup>       |
| SnO <sub>2</sub> /0.14@N-rGO                | -0.8              | 89 C1                                   | 21.3 ( <i>j</i> <sub>total</sub> )                                                    | 2018<br><i>Appl. Catal. B: Environ.</i> <sup>5</sup>  |
| Au-Sn bimetallic nanoparticles              | -0.9              | 51(HCOO <sup>-</sup> )                  | -                                                                                     | 2019<br><i>ACS Energy Lett.</i> <sup>27</sup>         |
| SnO <sub>2</sub> -NCs                       | -1.0              | 82.4 C1<br>72.6<br>(HCOO <sup>-</sup> ) | 12.1( <i>j</i> <sub>total</sub> )<br>9.4 ( <i>j</i> <sub>HCOO<sup>-</sup></sub> )     | This work                                             |
| SnO <sub>2</sub> -NFs                       | -1.0              | 91.5 C1<br>82.1<br>(HCOO <sup>-</sup> ) | 12.9( <i>j</i> <sub>total</sub> )<br>10.3<br>( <i>j</i> <sub>HCOO<sup>-</sup></sub> ) | This work                                             |

[a]: C1 represents the production of HCOO<sup>-</sup> and CO.

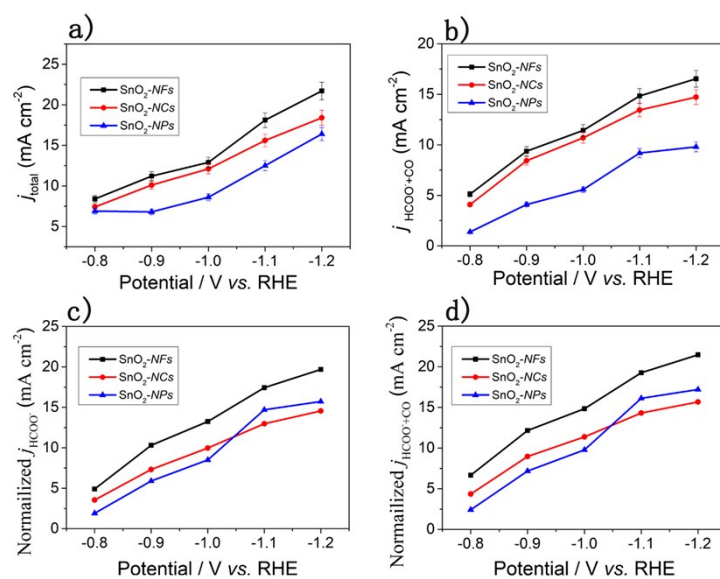

**Figure S9.** Total current density (a), partial ( $j_{\text{HCOO}^+\text{CO}}$ ) current density (b) and ECSA-normalized current densities (c, d) of  $\text{SnO}_2\text{-NCs}$ ,  $\text{SnO}_2\text{-NFs}$  and  $\text{SnO}_2\text{-NPs}$ .

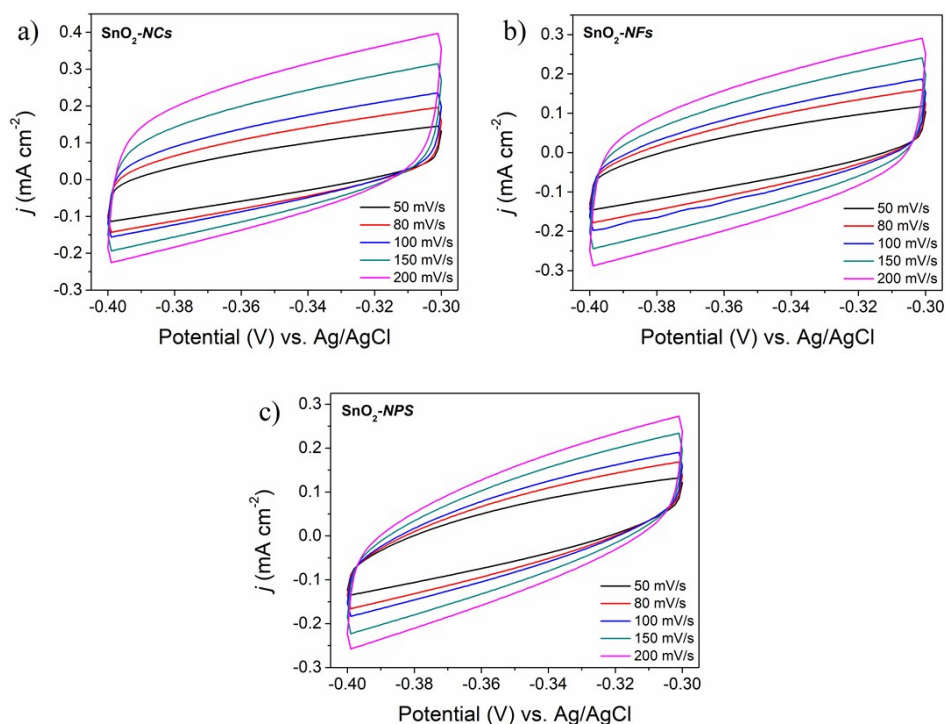

**Figure S10.** CV scans under different scan rates for  $\text{SnO}_2\text{-NCs}$  (a),  $\text{SnO}_2\text{-NFs}$  (b), and  $\text{SnO}_2\text{-NPs}$  (c).

The ECSAs of  $\text{SnO}_2\text{-NCs}$ ,  $\text{SnO}_2\text{-NFs}$  and  $\text{SnO}_2\text{-NPs}$  electrocatalysts were evaluated by the electrochemical double-layer capacitance (Cdl), which was obtained from the



CVs (Figure S10) at different scan rates. CV measurement were performed from -0.3 to -0.4 V (vs. Ag/AgCl) to ensure that the location of redox peak is avoided.

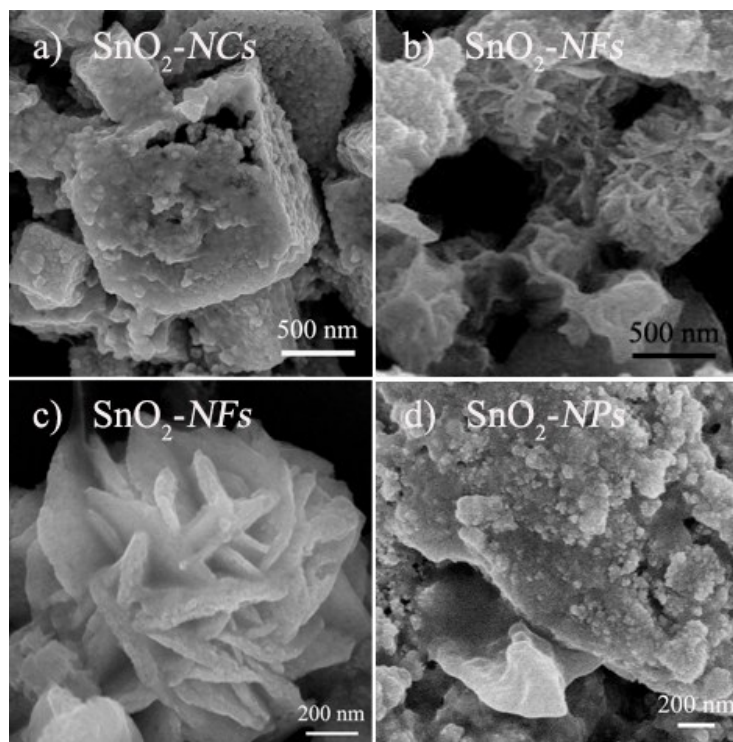

**Figure S11.** SEM images of the SnO<sub>2</sub>-NCs/CC (a) and SnO<sub>2</sub>-NFs/CC (b, c) electrode after long-term stability measurements; and freshly prepared SnO<sub>2</sub>-NPs/CC (d) electrode before electrochemical test.

As shown in Figure S11, the freshly prepared SnO<sub>2</sub>-NPs/CC electrode showed severe agglomeration before electrochemical test. In sharp contrast, the structure of SnO<sub>2</sub>-NCs/CC and SnO<sub>2</sub>-NFs/CC can be preserved to some extent after long-term stability measurements, indicating the efficient buffering effect of the 3D structure in electrolysis.

**Table S2.** Faradaic efficiencies of HCOO<sup>-</sup>, CO, H<sub>2</sub> production and the total current density for the catalyst of SnO<sub>2</sub>-NCs, SnO<sub>2</sub>-NFs and SnO<sub>2</sub>-NPs at low electrolytic potentials (-0.7 V vs. RHE).

| catalyst              | FE <sub>HCOO<sup>-</sup></sub> | FE <sub>CO</sub> | FE <sub>H<sub>2</sub></sub> | <i>j</i> <sub>total</sub> |
|-----------------------|--------------------------------|------------------|-----------------------------|---------------------------|
| SnO <sub>2</sub> -NCs | 24.1                           | 9.4              | 62.0                        | 3.9                       |

|                            |      |      |      |     |
|----------------------------|------|------|------|-----|
| <b>SnO<sub>2</sub>-NFs</b> | 40.5 | 42.9 | 20.2 | 3.6 |
| <b>SnO<sub>2</sub>-NPs</b> | 23.8 | 30.9 | 42.0 | 3.2 |

## References

1. B. Kumar, V. Atla, J. P. Brian, S. Kumari, T. Q. Nguyen, M. Sunkara and J. M. Spurgeon, *Angew. Chem. Int. Ed.*, 2017, **129**, 1-6.
2. Y. Zeng, J. Luo, Y. Wang, L. Qiao, B. Zou and W. Zheng, *Nanoscale*, 2017, **9**, 17576-17584.
3. S. Liu, J. Xiao, X. F. Lu, J. Wang, X. Wang and X. W. D. Lou, *Angew. Chem. Int. Ed.*, 2019, **58**, 8499-8503.
4. J. Gu, F. Heroguel, J. Luterbacher and X. Hu, *Angew. Chem. Int. Ed.*, 2018, **57**, 2943-2947.
5. B. Zhang, Z. Guo, Z. Zuo, W. Pan and J. Zhang, *Appl. Catal., B*, 2018, **239**, 441-449.
6. Y. Chen and M. W. Kanan, *J. Am. Chem. Soc.*, 2012, **134**, 1986-1989.
7. S. Zhang, P. Kang and T. J. Meyer, *J. Am. Chem. Soc.*, 2014, **136**, 1734-1737.
8. F. Li, L. Chen, G. P. Knowles, D. R. MacFarlane and J. Zhang, *Angew. Chem. Int. Ed.*, 2017, **56**, 505-509.
9. F. Li, L. Chen, M. Xue, T. Williams, Y. Zhang, D. R. MacFarlane and J. Zhang, *Nano Energy*, 2017, **31**, 270-277.
10. Z. Chen, S. Yao and L. Liu, *J. Mater. Chem. A*, 2017, **5**, 24651-24656.
11. J. Qiao, Q. Zhang, Y. Zhang, J. Mao, J. Liu, Y. Zhou and D. Guay, *ChemSusChem*, 2019.
12. W. Deng, L. Zhang, L. Li, S. Chen, C. Hu, Z. J. Zhao, T. Wang and J. Gong, *J. Am. Chem. Soc.*, 2019, **141**, 2911-2915.
13. C. Liang, B. Kim, S. Yang, Y. L. Yang Liu, C. Francisco Woellner, Z. Li, R. Vajtai, W. Yang, J. Wu, P. J. A. Kenis and Pulickel M. Ajayan, *J. Mater. Chem. A*, 2018, **6**, 10313-10319.
14. Q. Wang, X. Wang, C. Wu, Y. Cheng, Q. Sun and H. Yu, *J. CO<sub>2</sub> Util.*, 2018, **26**, 425-433.
15. X. Bai, W. Chen, C. Zhao, S. Li, Y. Song, R. Ge, W. Wei and Y. Sun, *Angew. Chem. Int. Ed.*, 2017, **56**, 12219-12223.
16. L. Fan, Z. Xia, M. Xu, Y. Lu and Z. Li, *Adv. Funct. Mater.*, 2018, **28**, 1706289.
17. R. Daiyan, X. Lu, W. H. Saputera, Y. H. Ng and R. Amal, *ACS Sustainable Chem. Eng.*, 2018, **6**, 1670-1679.
18. P. Han, Z. Wang, M. Kuang, Y. Wang, J. Liu, L. Hu, L. Qian and G. Zheng, *Adv. Energy Mater.*, 2018, **8**, 1801230.
19. N. Han, Y. Wang, J. Deng, J. Zhou, Y. Wu, H. Yang, P. Ding and Y. Li, *J. Mater. Chem. A*, 2019, **7**, 1267-1272.
20. Y. Liu, M. Fan, X. Zhang, Q. Zhang, D. Guay and J. Qiao, *Electrochim. Acta*, 2017, **248**, 123-132.
21. H. Won da, C. H. Choi, J. Chung, M. W. Chung, E. H. Kim and S. I. Woo, *ChemSusChem*, 2015, **8**, 3092-3098.

22. F. Lei, W. Liu, Y. Sun, J. Xu, K. Liu, L. Liang, T. Yao, B. Pan, S. Wei and Y. Xie, *Nat. Commun.*, 2016, **7**, 12697.
23. S. Huo, Z. Weng, Z. Wu, Y. Zhong, Y. Wu, J. Fang and H. Wang, *ACS Appl. Mater. Interfaces*, 2017, **9**, 28519-28526.
24. Y. Yiliguma, Z. Wang, C. Yang, A. Guan, L. Shang, A. M. Al-Enizi, L. Zhang and G. Zheng, *J. Mater. Chem. A*, 2018, **6**, 20121-20127.
25. A. Zhang, R. He, H. Li, Y. Chen, T. Kong, K. Li, H. Ju, J. Zhu, W. Zhu and J. Zeng, *Angew. Chem. Int. Ed.*, 2018, **57**, 10954–10958.
26. G. Wen, D. U. Lee, B. Ren, F. M. Hassan, G. Jiang, Z. P. Cano, J. Gostick, E. Croiset, Z. Bai, L. Yang and Z. Chen, *Adv. Energy Mater.*, 2018, **8**, 1802427.
27. A. M. Ismail, G. F. Samu, Á. Balog, E. Csapó and C. Janáky, *ACS Energy Letters*, 2018, **4**, 48-53.
